# Supplementary material for: Characterization of a Novel Influenza Virus in Cattle and Swine: Proposal for a New Genus in the Orthomyxoviridae Family
Source: PubMed Central journal article supplement — mBio. 2014 Mar 4;5(2):e00031-14. doi: 10.1128/mBio.00031-14 (PMC3958797; doi:10.1128/mbio.00031-14), 2014-03-04
Supplement: mbo001141760sf01.pdf [file mbo001141760sf01.pdf]

**A**

| Plaque | PB2  | PB1   | P3    | HEF  | NP    | P42           | NS            |
|--------|------|-------|-------|------|-------|---------------|---------------|
| 1      | C/OK | C/660 | C/OK  | C/OK | C/OK  | C/OK          | C/OK          |
| 2      | C/OK | C/660 | C/660 | C/OK | C/OK  | C/OK          | Indeterminate |
| 3      | C/OK | C/OK  | C/OK  | C/OK | C/660 | C/OK          | C/OK          |
| 4      | C/OK | C/660 | C/OK  | C/OK | C/660 | C/660         | Indeterminate |
| 5      | C/OK | C/660 | C/OK  | C/OK | C/660 | C/660         | Indeterminate |
| 6      | C/OK | C/660 | C/OK  | C/OK | C/OK  | Indeterminate | C/OK          |
| 7      | C/OK | C/660 | C/OK  | C/OK | C/OK  | C/660         | C/OK          |
| 8      | C/OK | C/OK  | C/OK  | C/OK | C/660 | C/660         | C/OK          |
| 9      | C/OK | C/660 | C/660 | C/OK | C/OK  | C/660         | C/660         |
| 10     | C/OK | C/OK  | C/OK  | C/OK | C/660 | C/OK          | C/OK          |

C/OK
  C/660
  Indeterminate

**B**

| Plaque | PB2   | PB1           | P3    | HEF           | NP            | P42           | NS    |
|--------|-------|---------------|-------|---------------|---------------|---------------|-------|
| 1      | C/OK  | C/660         | C/OK  | C/OK          | C/OK          | Indeterminate | C/OK  |
| 2      | C/OK  | C/660         | C/OK  | C/OK          | C/OK          | C/OK          | C/OK  |
| 3      | C/OK  | Indeterminate | C/OK  | C/OK          | C/OK          | Indeterminate | C/OK  |
| 4      | C/OK  | C/660         | C/OK  | C/OK          | C/OK          | Indeterminate | C/OK  |
| 5      | C/OK  | C/660         | C/660 | C/OK          | C/660         | C/660         | C/OK  |
| 6      | C/OK  | C/660         | C/660 | C/OK          | C/660         | Indeterminate | C/OK  |
| 7      | C/OK  | C/660         | C/OK  | C/OK          | Indeterminate | Indeterminate | C/OK  |
| 8      | C/OK  | C/660         | C/OK  | Indeterminate | Indeterminate | C/660         | C/660 |
| 9      | C/660 | C/660         | C/660 | C/660         | C/660         | C/660         | C/660 |
| 10     | C/660 | C/660         | C/660 | Indeterminate | C/660         | C/660         | C/660 |

C/OK
  C/660
  Indeterminate between C/OK and C/660

**Figure S1. Genotypes in plaque purified viruses following co-infection of ST cells with C/OK and C/660 (A) and with C/OK, C/660, C/JHB and C/Tay (B).**

Different colored squares denote the identities of viral segments.
