# Supplementary material for: Characterization of a Novel Influenza Virus in Cattle and Swine: Proposal for a New Genus in the Orthomyxoviridae Family
Source: PubMed Central journal article supplement — mBio. 2014 Mar 4;5(2):e00031-14. doi: 10.1128/mBio.00031-14 (PMC3958797; doi:10.1128/mbio.00031-14), 2014-03-04
Supplement: mbo001141760sf02.pdf [file mbo001141760sf02.pdf]

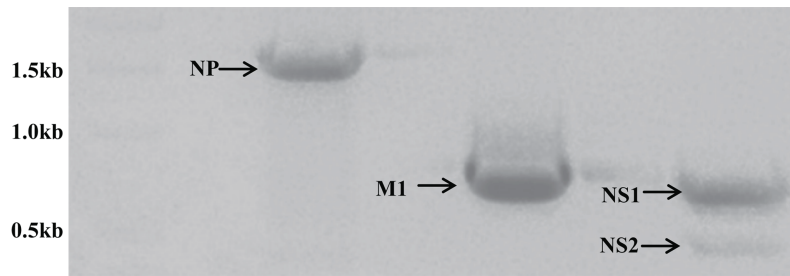

**Figure S2. RT-PCR amplification of swine C/OK M, NS, and NP segments from infected ST cells with C/OK virus at a MOI of 0.01 at 18 h post infection.**
