# Supplementary material for: Characterization of a Novel Influenza Virus in Cattle and Swine: Proposal for a New Genus in the Orthomyxoviridae Family
Source: PubMed Central journal article supplement — mBio. 2014 Mar 4;5(2):e00031-14. doi: 10.1128/mBio.00031-14 (PMC3958797; doi:10.1128/mbio.00031-14), 2014-03-04
Supplement: mbo001141760sf05.pdf [file mbo001141760sf05.pdf]

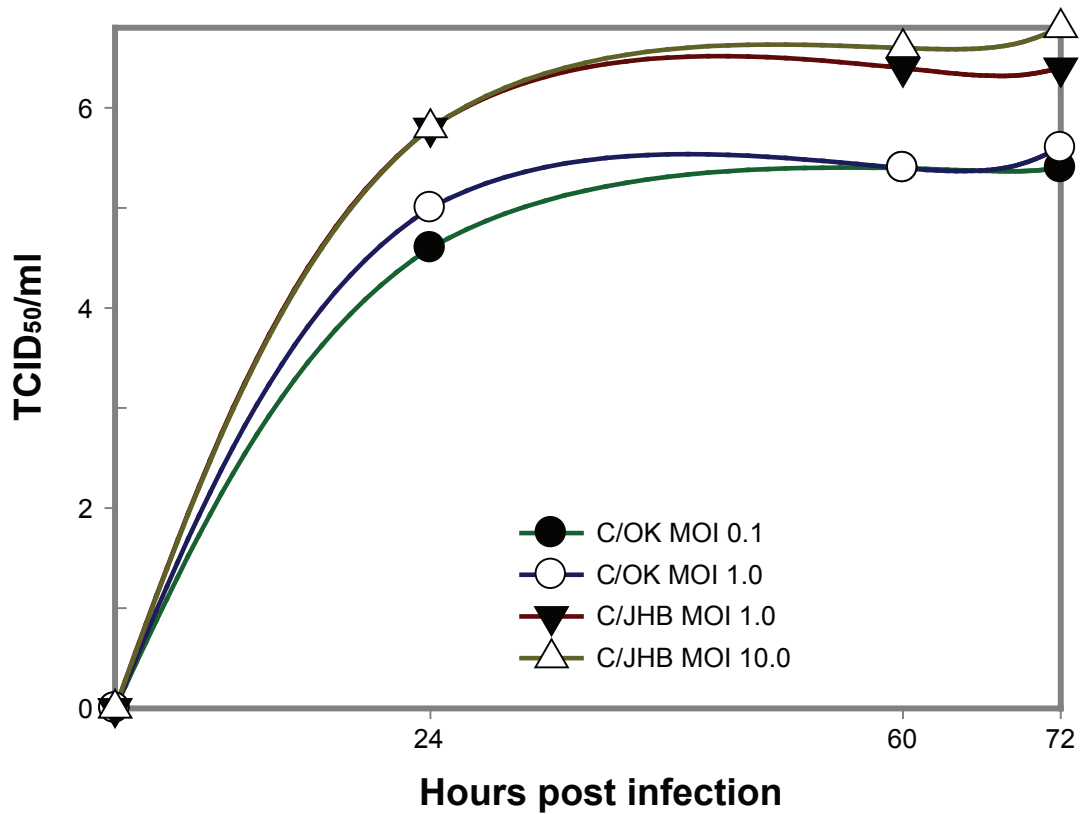

**Figure S5. Growth of influenza C/swine/Oklahoma/1334/2011 and influenza C/Johannesburg/1/66 in ST cell cultures. Cells were inoculated respectively with a multiplicity of infection of 0.1 and 1.0 for C/OK and 1.0 and 10.0 for C/JHB and incubated at 33°C. Virus was titrated at the indicated time points on ST cells. Titers of viruses used for inoculation were 6.9 TCID<sub>50</sub>/mL for C/OK virus and 7.9 TCID<sub>50</sub>/mL for C/JHB virus.**
